# Supplementary material for: Structures of hydrogen bond networks formed by a few tens of methanol molecules in the gas phase: size-selective infrared spectroscopy of neutral and protonated methanol clusters
Source: Royal Society of Chemistry journal article supplement (doi:10.1039/c3cp50985k), 2013-01-01
Supplement: c3cp50985k.pdf [file c3cp50985k.pdf]

## Supplementary Information

# Structures of Hydrogen Bond Networks Formed by a Few Tens of Methanol Molecules in the Gas Phase: Size-Selective Infrared Spectroscopy of Neutral and Protonated Methanol Clusters

*Tomohiro Kobayashi,<sup>1</sup> Ryunosuke Shishido,<sup>1</sup> Kenta Mizuse,<sup>1†</sup> Asuka Fujii,<sup>1\*</sup>  
Jer-Lai Kuo<sup>2</sup>*

Department of Chemistry, Graduate School of Science, Tohoku University, Sendai  
980-8578, Japan

Institute of Atomic and Molecular Sciences, Academia Sinica, Taipei 10617, Taiwan

\* To whom corresponding should be addressed.

E-mail: asukafujii@m.tohoku.ac.jp (A.F.)

† Present address: Institute for Molecular Science, Myodaiji, Okazaki, 444-8585, Japan.

<sup>1</sup> Tohoku University

<sup>2</sup> Academia Sinica

## Contents

- 1. Electronic spectrum of large-sized phenol-(MeOH)<sub>n</sub> clusters and mass spectrum obtained by resonant two-photon ionization of phenol-(MeOH)<sub>n</sub>**
- 2. Evaluation of the number of evaporated methanol molecules upon the ionization of large-sized phenol-(MeOH)<sub>n</sub>**

## 1. Electronic spectrum of large-sized phenol-(MeOH)<sub>n</sub> clusters and mass spectrum obtained by resonant two-photon ionization of phenol-(MeOH)<sub>n</sub>

Figure S1(a) shows the 0-0 band region of the S<sub>1</sub>-S<sub>0</sub> electronic spectrum of jet-cooled phenol. The origin band of free phenol is seen at 36348 cm<sup>-1</sup>.<sup>1</sup> By monitoring the [phenol-(MeOH)<sub>19</sub>]<sup>+</sup> cluster ion signal produced by the resonant two photon ionization, an electronic spectrum of the phenol chromophore in large-sized methanol clusters is obtained. The spectrum is shown in Figure S1(b). The spectrum is totally broadened and no structure is seen in the 0-0 band region. This situation is same as the spectra of large-sized phenol-(H<sub>2</sub>O)<sub>n</sub> clusters.<sup>2</sup> When the ionization laser frequency is fixed at 36220 cm<sup>-1</sup>, a mass spectrum of produced cluster ions shown in Figure S2 is obtained. Large-sized cluster ions up to *n* = 39 appear in the mass spectrum. These electronic and mass spectra demonstrate that all large-sized phenol-(MeOH)<sub>n</sub> clusters are ionized by the excitation of the broadened electronic transition of the phenol chromophore.

### Figure S1

(a) Electronic spectrum of free phenol in the S<sub>1</sub>-S<sub>0</sub> band origin region. (b) Electronic spectrum of large-sized phenol-(MeOH)<sub>n</sub> obtained by monitoring [phenol(MeOH)<sub>19</sub>]<sup>+</sup> ion.

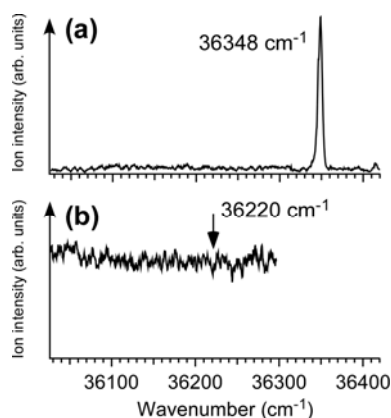

### Figure S2

Mass spectrum obtained by the resonant two-photon ionization of phenol-(MeOH)<sub>n</sub>

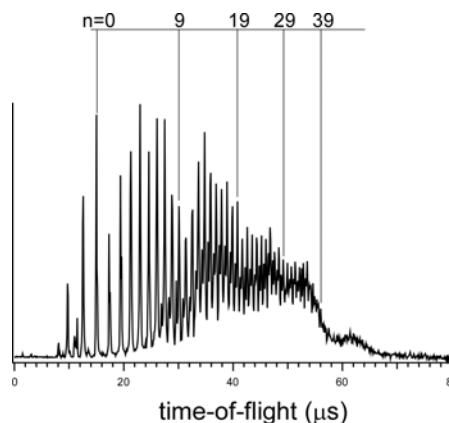

## 2. Evaluation of the number of evaporated methanol molecules upon the resonant two photon ionization of large-sized phenol-(MeOH)<sub>n</sub>

When a phenol-(MeOH)<sub>n</sub> cluster is ionized, the excess charge is initially localized in the phenol moiety. In large-sized clusters, however, the proton transfer occurs and the cluster becomes [phenoxy radical-H<sup>+</sup>(MeOH)<sub>n</sub>].<sup>3-4</sup> Figure S3 shows the schematic energy diagram on the photoionization and dissociation. When we assume sequential evaporation of single methanol molecules following the resonant two-photon ionization, the maximum number of evaporated molecules upon the ionization (maximum  $\Delta n$ ) is given by

$$\text{maximum } \Delta n = E_{\text{excess}}/D(D_0),$$

where  $E_{\text{excess}}$  is the maximum excess energy upon the ionization and  $D(D_0)$  is the dissociation energy of the one methanol loss channel in [phenoxy radical-H<sup>+</sup>(MeOH)<sub>n</sub>].

In the previous study on large-sized phenol-(H<sub>2</sub>O)<sub>n</sub> clusters, we evaluate  $E_{\text{excess}}$  by using DFT calculations.<sup>2</sup> The phenol containing clusters were constructed on the basis of the minimum energy structures of neutral and protonated water clusters, which have been extensively searched by various theoretical methods. On the other hand, large-sized neutral and protonated methanol clusters lack such theoretical information. Then, in the present study, we roughly estimate  $E_{\text{excess}}$  from that of the case of water clusters.

The energy scheme shows

$$E_{\text{excess}} = 2E_{\text{UV}} - [E(D_0) - E(S_0)],$$

where  $E_{\text{UV}}$  is the energy of the UV photon used to ionize the cluster,  $E(D_0)$  and  $E(S_0)$  are the electronic potential energies of the cationic and neutral ground states, respectively.  $[E(D_0) - E(S_0)]$  is equivalent to the enthalpy change of the reaction

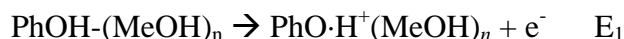

This reaction can be decomposed to the following steps

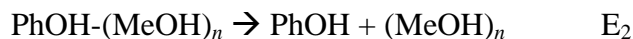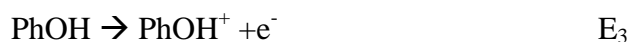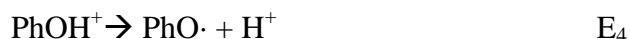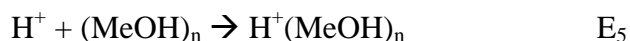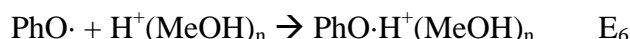

From the thermodynamical cycle,

$$[E(D_0) - E(S_0)] = E_1 = E_2 + E_3 + E_4 + E_5 + E_6$$

In  $E_2$ - $E_6$ ,  $E_2$ ,  $E_5$ , and  $E_6$  should be changed when (MeOH)<sub>n</sub> is replaced by (H<sub>2</sub>O)<sub>n</sub>.  $E_2$

and  $E_6$  are dissociation and solvation energies of one molecule in clusters, respectively, and change of the energy in the replacement of  $(\text{MeOH})_n$  by  $(\text{H}_2\text{O})_n$  should be within 10 kcal/mol at most.  $E_5$  is proton affinity of a neutral cluster. For  $(\text{MeOH})_n$  and  $(\text{H}_2\text{O})_n$ , those values are available only for  $n \leq \sim 6$ , and they are 227 and 237 kcal/mol, respectively, at  $n = 6$ .<sup>5,6</sup> A clear trend is also seen that the increase of the proton affinity with increasing  $n$  of these clusters almost saturates at this size. Therefore, it is reasonable that the change of  $E_5$  in the replacement of  $(\text{MeOH})_n$  by  $(\text{H}_2\text{O})_n$  is  $\sim 10$  kcal/mol. Thus, the maximum difference of  $E_1$  between  $(\text{MeOH})_n$  and  $(\text{H}_2\text{O})_n$  is estimated to be  $\sim 30$  kcal/mol ( $10500 \text{ cm}^{-1}$ ).

In the previous study,<sup>2</sup>  $E_1$  of phenol- $(\text{H}_2\text{O})_{19}$  was evaluated to be  $\sim 55000 \text{ cm}^{-1}$ . Thus, the minimum value of  $E_1$  for large-sized phenol- $(\text{MeOH})_n$  (which results in the maximum excess energy) is  $\sim (55000 - 10500) = 44500 \text{ cm}^{-1}$ . The maximum excess energy for the UV photon at  $36220 \text{ cm}^{-1}$  is estimated to be  $27640 \text{ cm}^{-1}$ . The dissociation energy of one methanol molecule from  $\text{H}^+(\text{MeOH})_n$  is  $\sim 3000 \text{ cm}^{-1}$ .<sup>7</sup> Therefore, the maximum  $\Delta n$  is  $\sim 9.2$ . With a small margin, we employ the value maximum  $\Delta n = \sim 10$  in the present study.

**Figure S3**

Schematic energy diagram of the resonant two-photon ionization and following dissociation of large-sized phenol- $(\text{MeOH})_n$

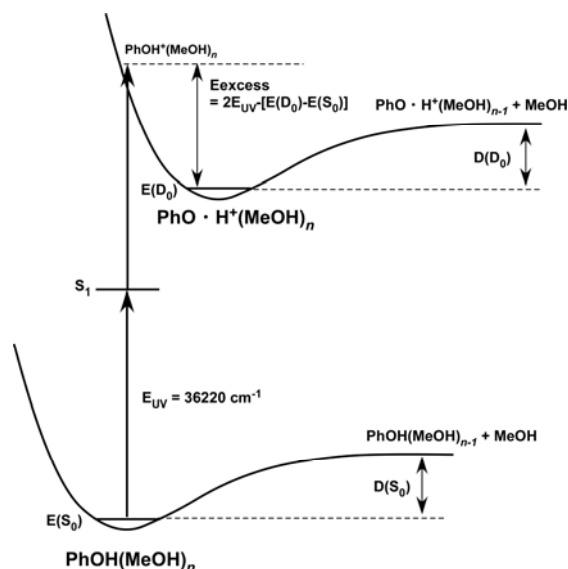

## References

1. T. Ebata, T. Watanabe, N. Mikami, *J. Phys. Chem.* 1995, **99**, 5761-5764.
2. K. Mizuse, T. Hamashima, A. Fujii, *J. Phys. Chem. A* 2009, **113**, 12134-12141.
3. S. Sato, N. Mikami, *J. Phys. Chem.* 1996, **100**, 4765-4769.
4. T. Sawamura, A. Fujii, S. Sato, T. Ebata, N. Mikami, *J. Phys. Chem.* 1996, **100**,

8131-8138.

5. R. Knochenmuss, O. Cheshnovsky, S. Leutwyler, *Chem. Phys. Lett.* 1988, **144**, 317-323.

6. Y. Kawai, S. Yamaguchi, Y. Okada, K. Takeuchi, Y. Yamaguchi, S. Ozawa, H. Nakai, *Chem. Phys. Lett.* 2003, **377**, 69-73.

7. M. Meot-Ner (Mautner), *J. Am. Chem. Soc.* 1992, **114**, 3312-3322.
